# Supplementary material
Source: HighWire-hosted journal article supplement (https://jitc.bmj.com/content/7/1/257)
Supplement: media-2 [file media-2.zip]

**Table S1. Distribution of memory subsets in total and virus-specific CD8<sup>+</sup> T cells.**

|                                               | T <sub>CM</sub> | T <sub>EM</sub> | T <sub>EMRA</sub> |
|-----------------------------------------------|-----------------|-----------------|-------------------|
| <b>Total CD8 T cells (%) - n = 12</b>         |                 |                 |                   |
| <b>Average</b>                                | 20.34           | 30.18           | 15.39             |
| <b>Range</b>                                  | 5.86-51.6       | 17-52.2         | 4.3-53.8          |
| <b>Virus-specific CD8 T cells (%) - n = 6</b> |                 |                 |                   |
| <b>Average</b>                                | 23.87           | 46.45           | 24.47             |
| <b>Range</b>                                  | 3.23-86.2       | 5.32-80.7       | 0-54.8            |
