# Supplementary material
Source: HighWire-hosted journal article supplement (https://jitc.bmj.com/content/7/1/257)
Supplement: media-2 [file media-2.zip]

**Table S2. Clinical characteristics of the patients.**

| Patient        | Gender | Age | Tumor type                  | Stage at diagnosis | Samples's origin        | Other remarks                                                                                                               |
|----------------|--------|-----|-----------------------------|--------------------|-------------------------|-----------------------------------------------------------------------------------------------------------------------------|
| <b>Mel0011</b> | Male   | 40  | Skin melanoma               | pT3b pN0 M0, IIC   | subcutaneous metastasis | BRAF mutation: previously treated with trametinib, dabrafenib, and ipilimumab                                               |
| <b>Mel002</b>  | Male   | 58  | Skin melanoma               | pT1a pN0 M0, IA    | lymph node metastasis   |                                                                                                                             |
| <b>Mel007</b>  | Female | 52  | Skin melanoma               | pT2 pN3 M0, IIIC   | cutaneous metastasis    | BRAF mutation                                                                                                               |
| <b>Lau50</b>   | Male   | 65  | Melanoma of unknown primary | pT4 N2c M0, IIIB   | lymph node metastasis   | BRAF mutation; Isolated Limb Perfusion with Melphalan, TNF- $\alpha$ and IFN- $\gamma$ 2 years before surgery               |
| <b>Lau1015</b> | Male   | 70  | Skin melanoma               | pT2a N1b M1b, IV   | lung metastasis         | BRAF mutation; Vaccination with Melan-A natural and Tyrosinase peptides + CpG and Montanide adjuvants 1 year before surgery |
| <b>Lau1660</b> | Male   | 82  | Skin melanoma               | pT3b pN3 M1c, IV   | lymph node metastasis   |                                                                                                                             |
| <b>CRCm7</b>   | Female | 71  | Colon adenocarcinoma        | pT3 pN1 M1, IV     | lung metastasis         | KRAS mutation; Microsatellite stable                                                                                        |
| <b>CRCm8</b>   | Male   | 68  | Colon adenocarcinoma        | pT4 pN2 M1, IV     | liver metastasis        | NRAS mutation; MSS; previously treated with Folfixiri                                                                       |
| <b>CRCm9</b>   | Male   | 80  | Colon adenocarcinoma        | pT3 pN0 M0, IIA    | liver metastasis        | MSS                                                                                                                         |
| <b>CRCm10</b>  | Male   | 64  | Colon adenocarcinoma        | pT3 pN0 M1, IV     | Lung metastasis         | KRAS mutation; MSS; previously treated with Folfiri-bevacizumab and radiofrequency on liver metastasis                      |
| <b>URO334</b>  | Male   | 54  | no tumor                    | NA                 | Prostate                | Normal prostate tissue (no BPH, no inflammation)                                                                            |
| <b>URO442</b>  | Male   | 70  | no tumor                    | NA                 | Prostate                | Chronic prostatitis + BPH                                                                                                   |
| <b>URO476</b>  | Male   | 89  | prostate adenocarcinoma     | Gleason 5+4=9      | Prostate                | Prostate cancer + BPH                                                                                                       |
| <b>URO570</b>  | Male   | 72  | prostate adenocarcinoma     | Gleason 3+3=6      | Prostate                | Prostate cancer + BPH                                                                                                       |
| <b>URO575</b>  | Male   | 83  | prostate adenocarcinoma     | Gleason 4+4=8      | Prostate                | Prostate cancer + BPH                                                                                                       |
| <b>URO589</b>  | Male   | 70  | prostate adenocarcinoma     | Gleason 3+3=6      | Prostate                | Prostate cancer + BPH                                                                                                       |
| <b>URO372</b>  | Male   | 65  | no tumor                    | NA                 | Prostate                | Normal prostate tissue (no BPH, no inflammation)                                                                            |
| <b>URO344</b>  | Male   | 73  | prostate adenocarcinoma     | Gleason 4+5=9      | Prostate                | Prostate cancer                                                                                                             |

Microsatellite stable (MSS); Benign prostate hypertrophy (BPH)
