# Supplementary material
Source: HighWire-hosted journal article supplement (https://jitc.bmj.com/content/7/1/257)

## Supplementary Fig. 6

**a**

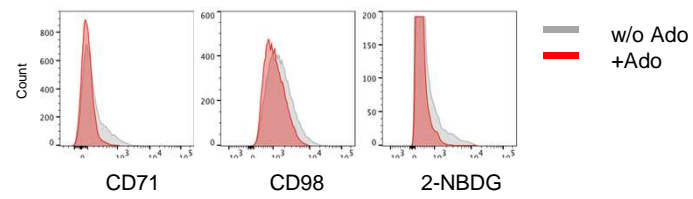

**b**

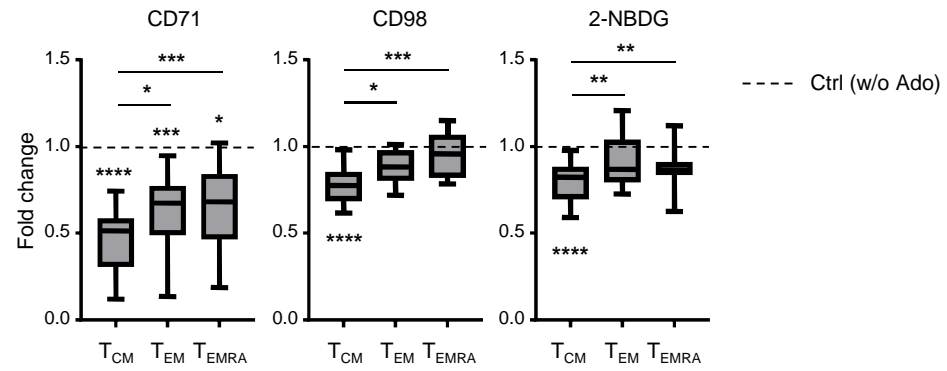

Supplement: media-1 [file media-1.zip]

## Supplementary figure 8

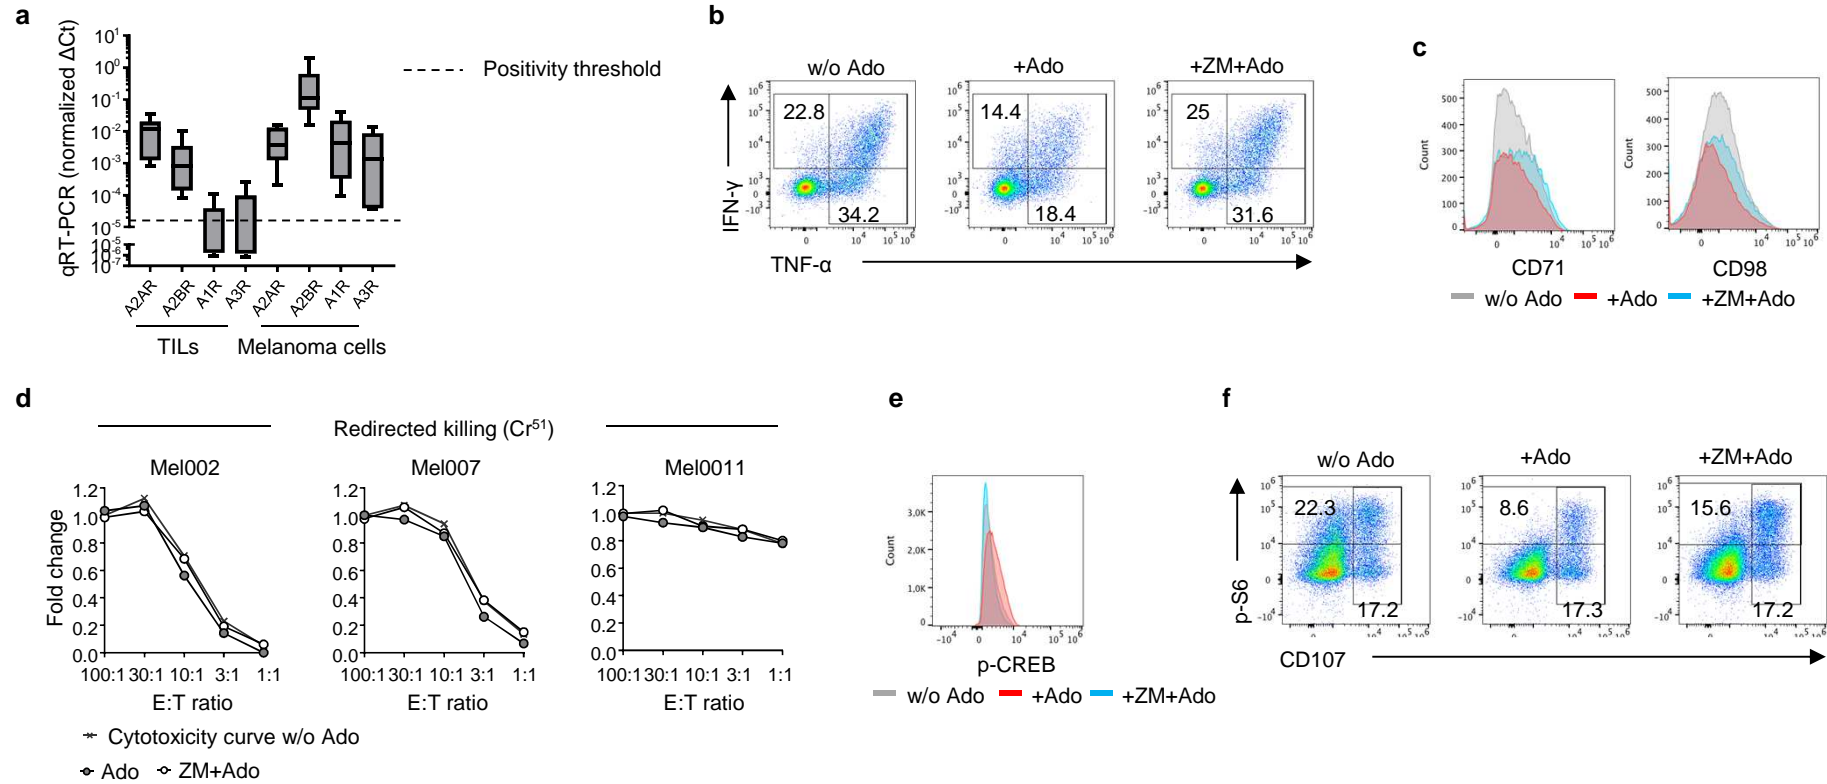

Supplement: media-1 [file media-1.zip]

## Supplementary figure 7

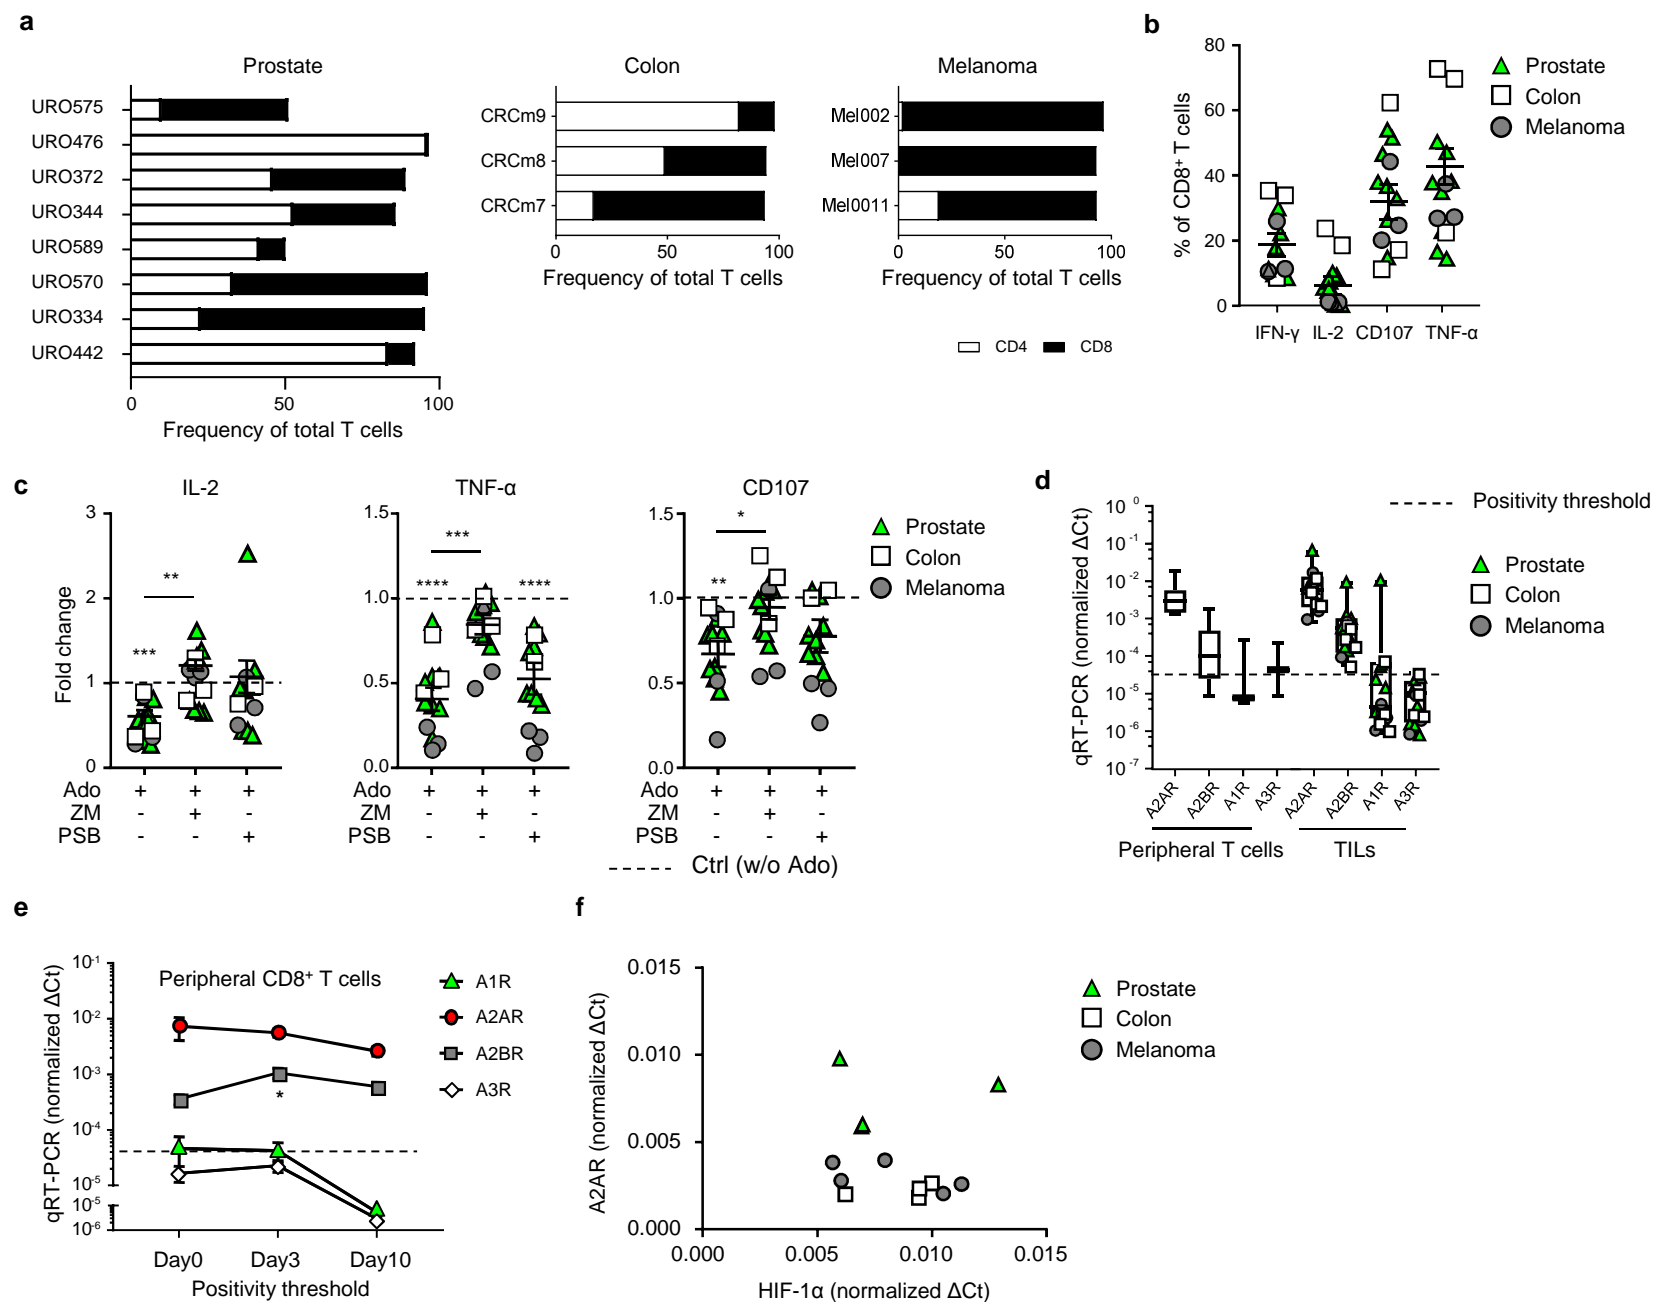

Supplement: media-1 [file media-1.zip]

**Supplementary Fig. 1**

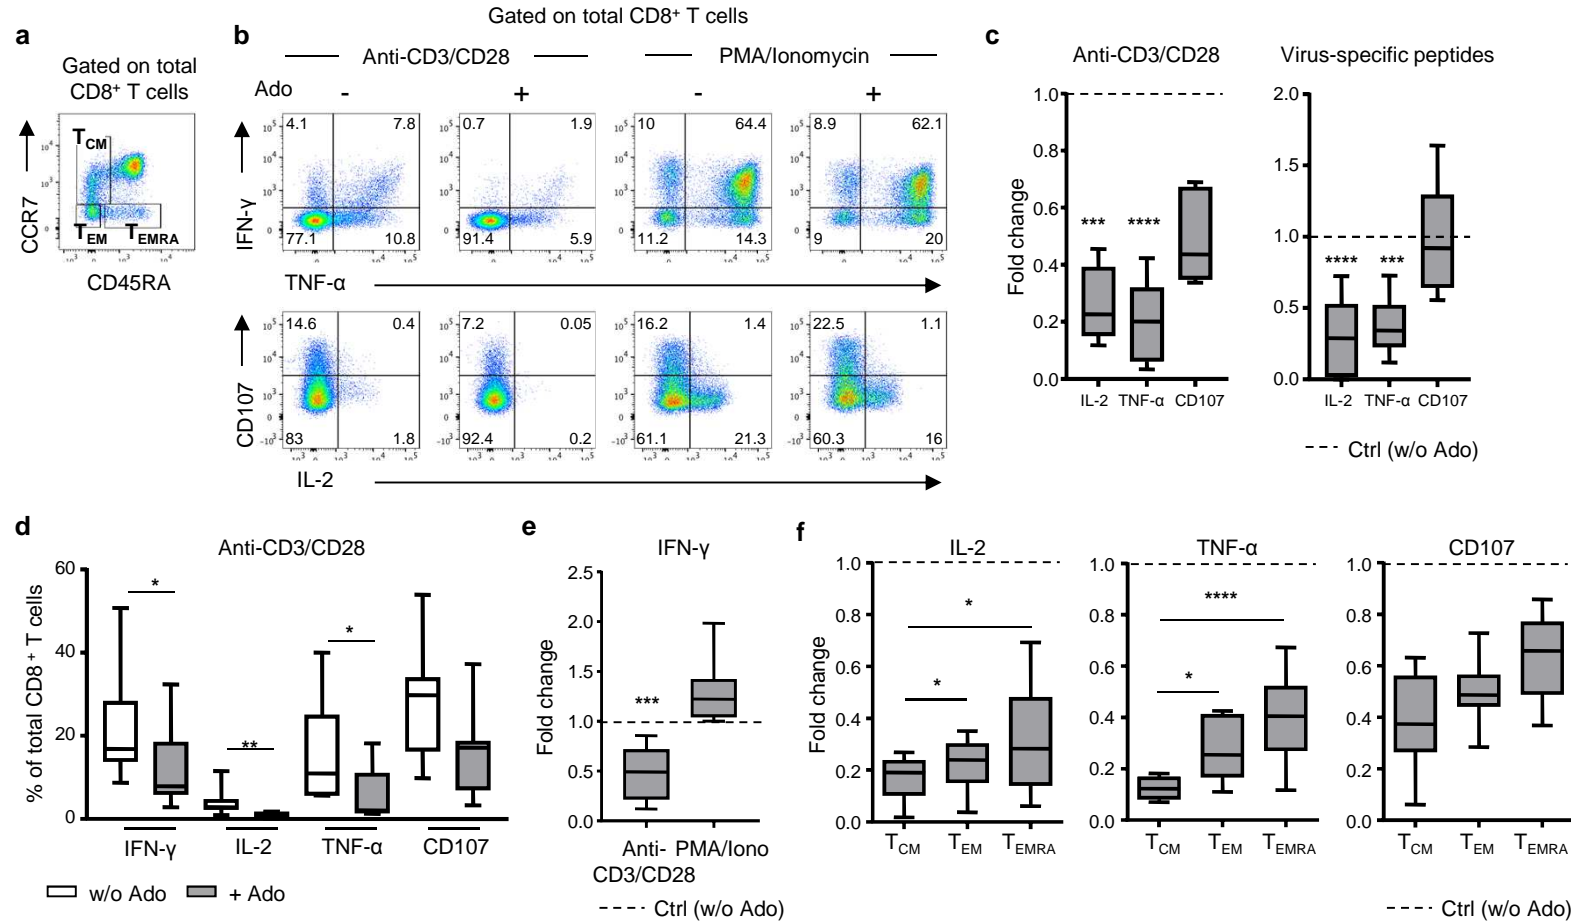

Supplement: media-1 [file media-1.zip]

Supplementary Fig. 4

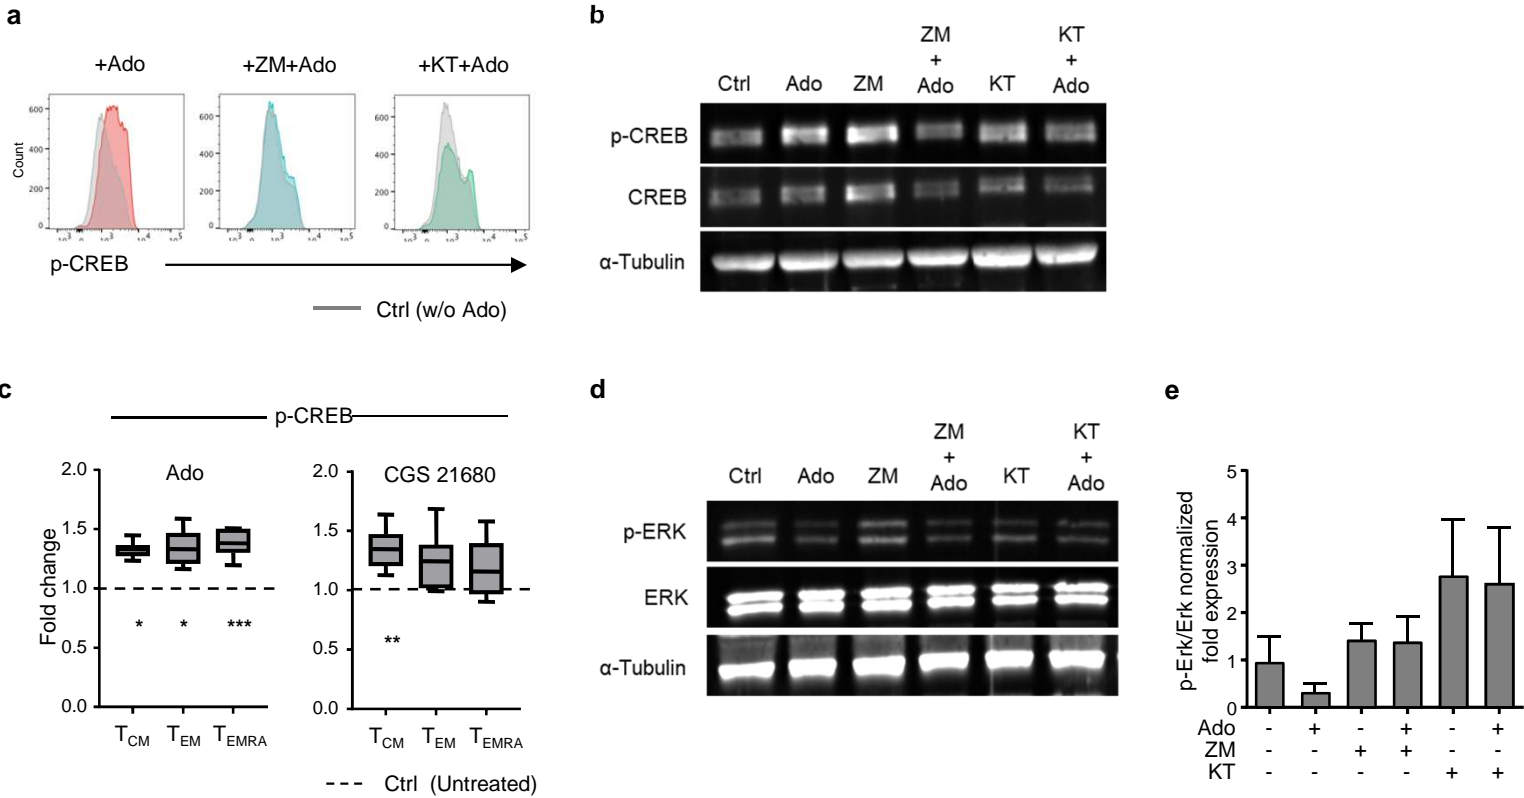

Supplement: media-1 [file media-1.zip]

**Supplementary Fig. 5**

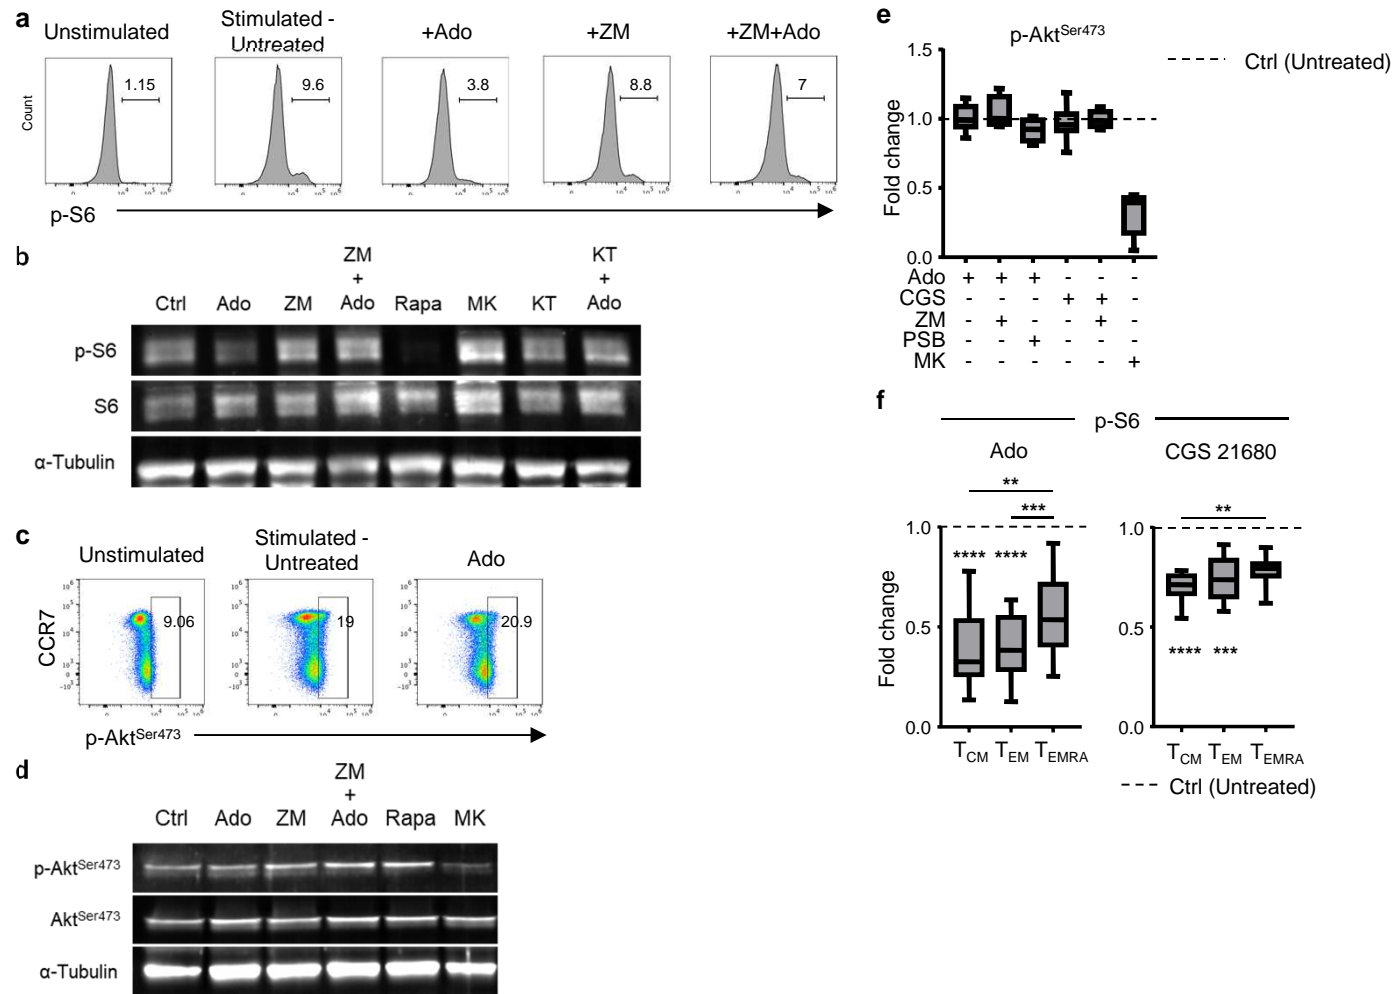

Supplement: media-1 [file media-1.zip]

**Supplementary Fig. 2**

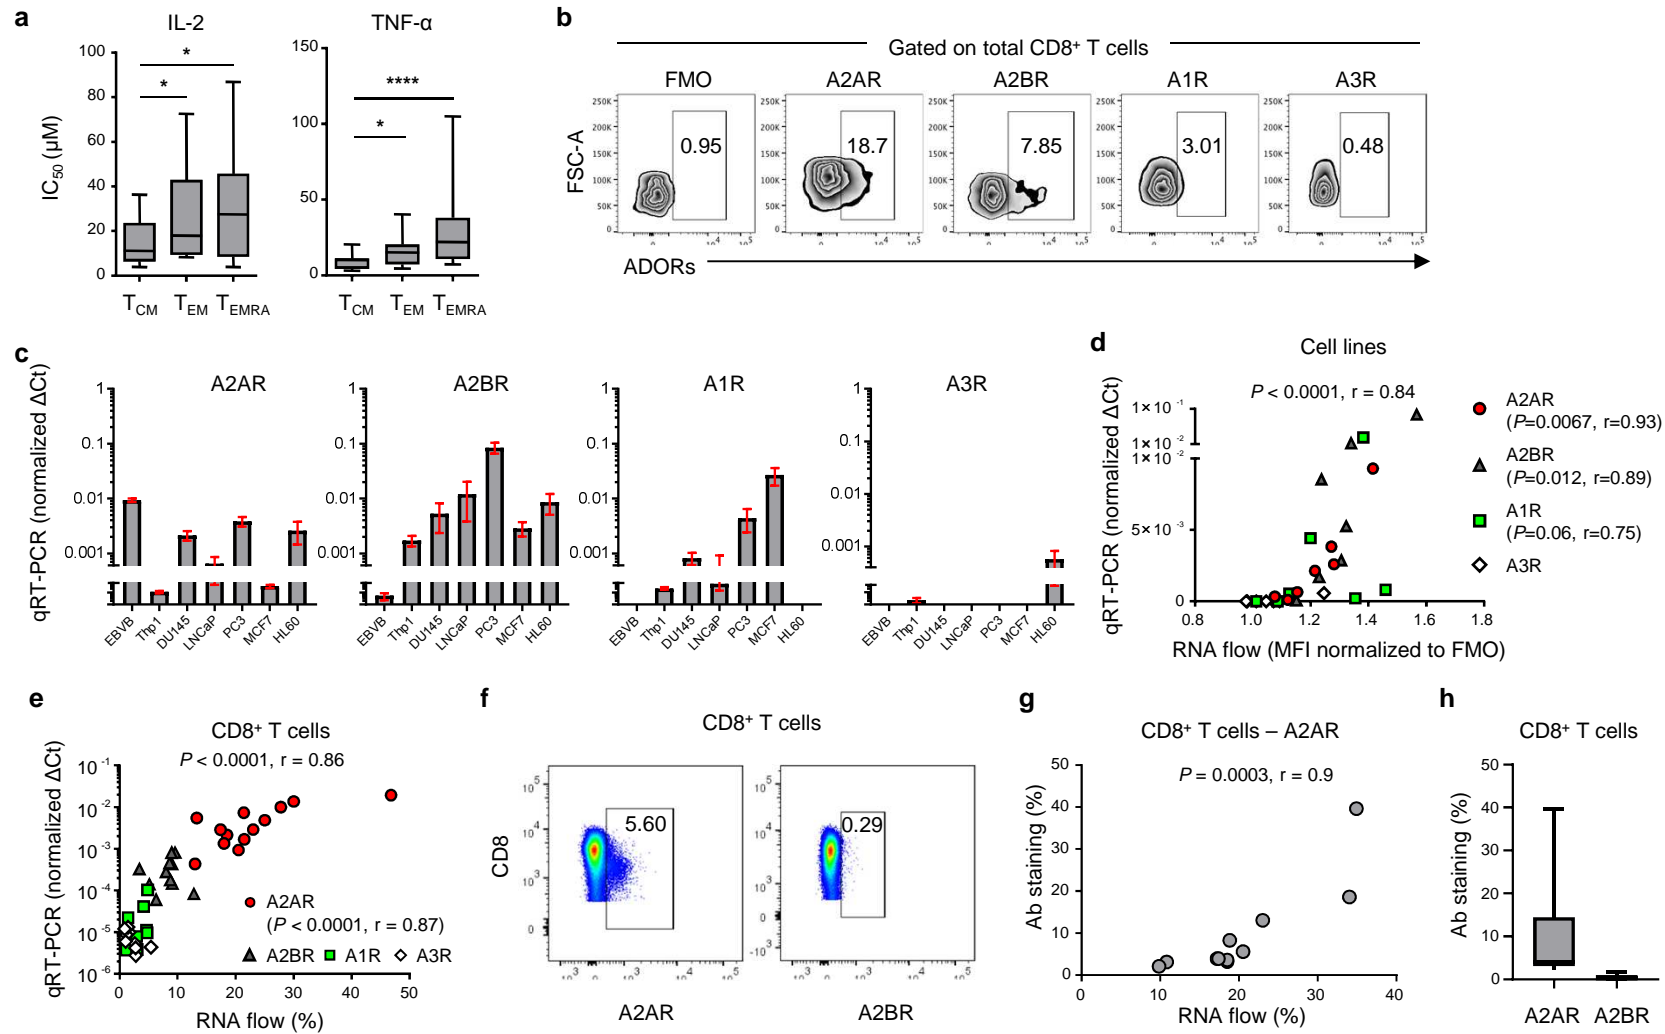

Supplement: media-1 [file media-1.zip]

**Supplementary Fig. 3**

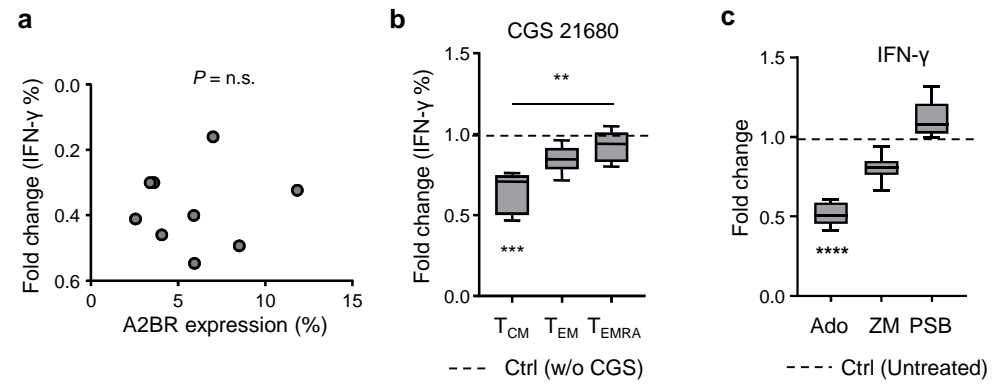

Supplement: media-1 [file media-1.zip]
